# Supplementary material for: Structural Characterization and In Vitro Anti-Inflammatory Activity of Polysaccharides Isolated from the Fruits of Rosa laevigata
Source: MDPI journal article supplement (doi:10.3390/ijms25042133), 2024-02-09
Supplement: s1 [file s1]

**Structural characterization and *in vitro* anti-inflammatory activity test of polysaccharides isolated from the fruits of *Rosa laevigata***

Song Peng <sup>a,b</sup>, Pengfei Gu <sup>c</sup>, Ningning Mao <sup>a,b</sup>, Lin Yu <sup>a,b</sup>, Tianyu Zhu <sup>a,b</sup>, Jin He <sup>a,b</sup>,  
Yang Yang <sup>a,b</sup>, Zhenguang Liu <sup>a,b</sup>, Deyun Wang <sup>a,b,\*</sup>

<sup>a</sup> Institute of Traditional Chinese Veterinary Medicine, College of Veterinary Medicine, Nanjing Agricultural University, Nanjing 210095, PR China.

<sup>b</sup> MOE Joint International Research Laboratory of Animal Health and Food Safety, College of Veterinary Medicine, Nanjing Agricultural University, Nanjing 210095, PR China.

<sup>c</sup> College of Traditional Chinese Veterinary Medicine, Hebei Agricultural University, Baoding, 071001, China.

\* Corresponding authors.

*E-mail addresses:* dywang@njau.edu.cn

## Supplementary Method

### S1. HPAEC conditions

The sample extracts were analyzed by high-performance anion-exchange chromatography (HPAEC) on a CarboPac PA-20 anion-exchange column (3 by 150 mm; Dionex) using a pulsed amperometric detector (PAD; Dionex ICS 5000 system) by Sanshu Biotech. Co., LTD (Shanghai, China). Flow rate, 0.5 mL/min; injection volume, 5  $\mu$ L; solvent system A : (ddH<sub>2</sub>O), solvent system B : (0.1M NaOH), solvent system C : (0.1M NaOH, 0.2M NaAc); gradient program, the volume ratio of solution A, B, C was 95:5:0 at 0 min, 85:5:10 at 26 min, 85:5:10 at 42 min, 60:0:40 at 42.1 min, 60:40:0 at 52 min, 95:5:0 at 52.1 min, 95:5:0 at 60 min.

### S2. Methylation analysis of RLPa-2

Approximately 5 mg of the sample was dissolved in pure water and reacted with 1 mL of 1-cyclohexyl-2-morpholinoethylcarbodiimide methyl p-toluenesulfonate (CMC, 100 mg/mL) for 2 h. The product was mixed with 1 mL of imidazole (2 mol/L), and divided equally into two parts. Then, one part was added with 1 mL NaBH<sub>4</sub> (30 mg/mL), and the other part was added with 1 mL NaBD<sub>4</sub> (30 mg/mL), dialyzing and lyophilizing to acquire the reduzates, and the reduzates were methylated in DMSO/NaOH with CH<sub>3</sub>I. After complete methylation, the permethylated products were hydrolyzed with TFA (2 mol/L) at 121°C for 1.5 h, reduced by NaBD<sub>4</sub> (1 mol/L) and acetylated with acetic anhydride for 2.5 h (100 °C). Finally, 500  $\mu$ L of dichloromethane was added, vortexed, mixed, centrifuged, and repeated thrice. The

aqueous phase was discarded, the lower dichloromethane phase was taken, and the product was analyzed by gas chromatography-mass spectrometry (GC-MS) (Agilent 7890A-5977B; Agilent Technologies Inc., USA) for analysis, and high purity helium (split ratio 10:1) was used as the carrier gas with an injection volume of 1  $\mu$ L. Mass spectrometry analysis was performed at the initial temperature of 140  $^{\circ}$ C for 2.0 min, and the temperature is increased to 230  $^{\circ}$ C by 3  $^{\circ}$ C/min for 3 min. The scan mode was SCAN with a range from 30 to 600 m/z.

## Supplementary Data

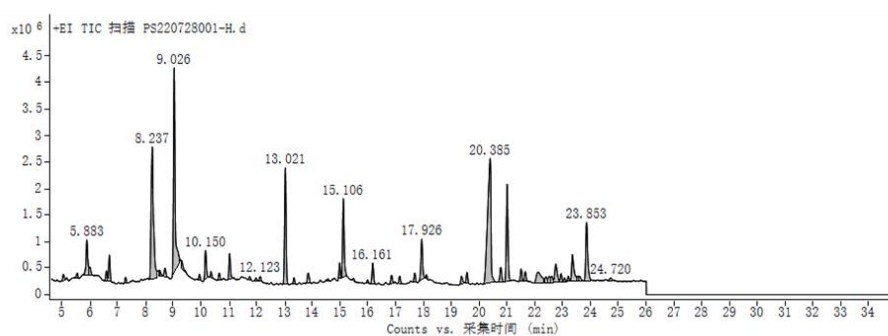

**Figure S1. The total ion chromatogram of RLPa-2 polysaccharides was methylated.**

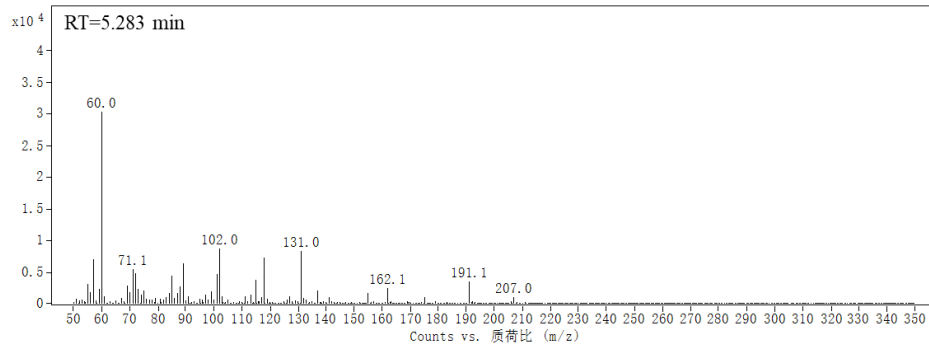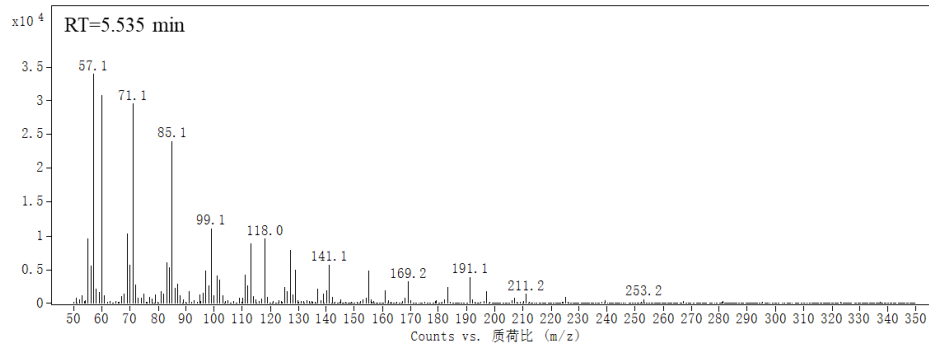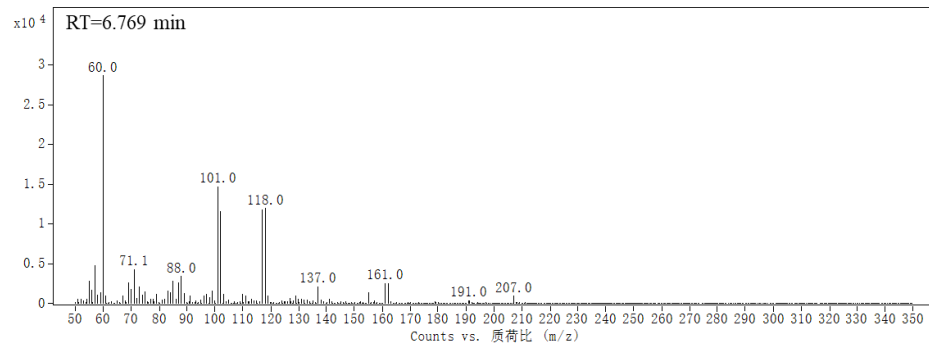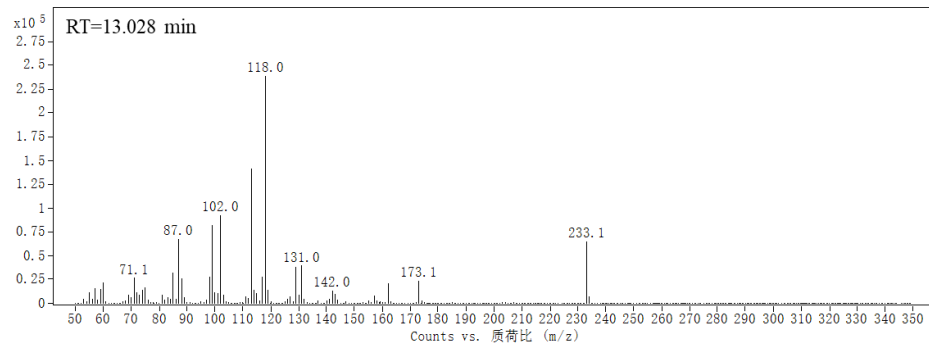

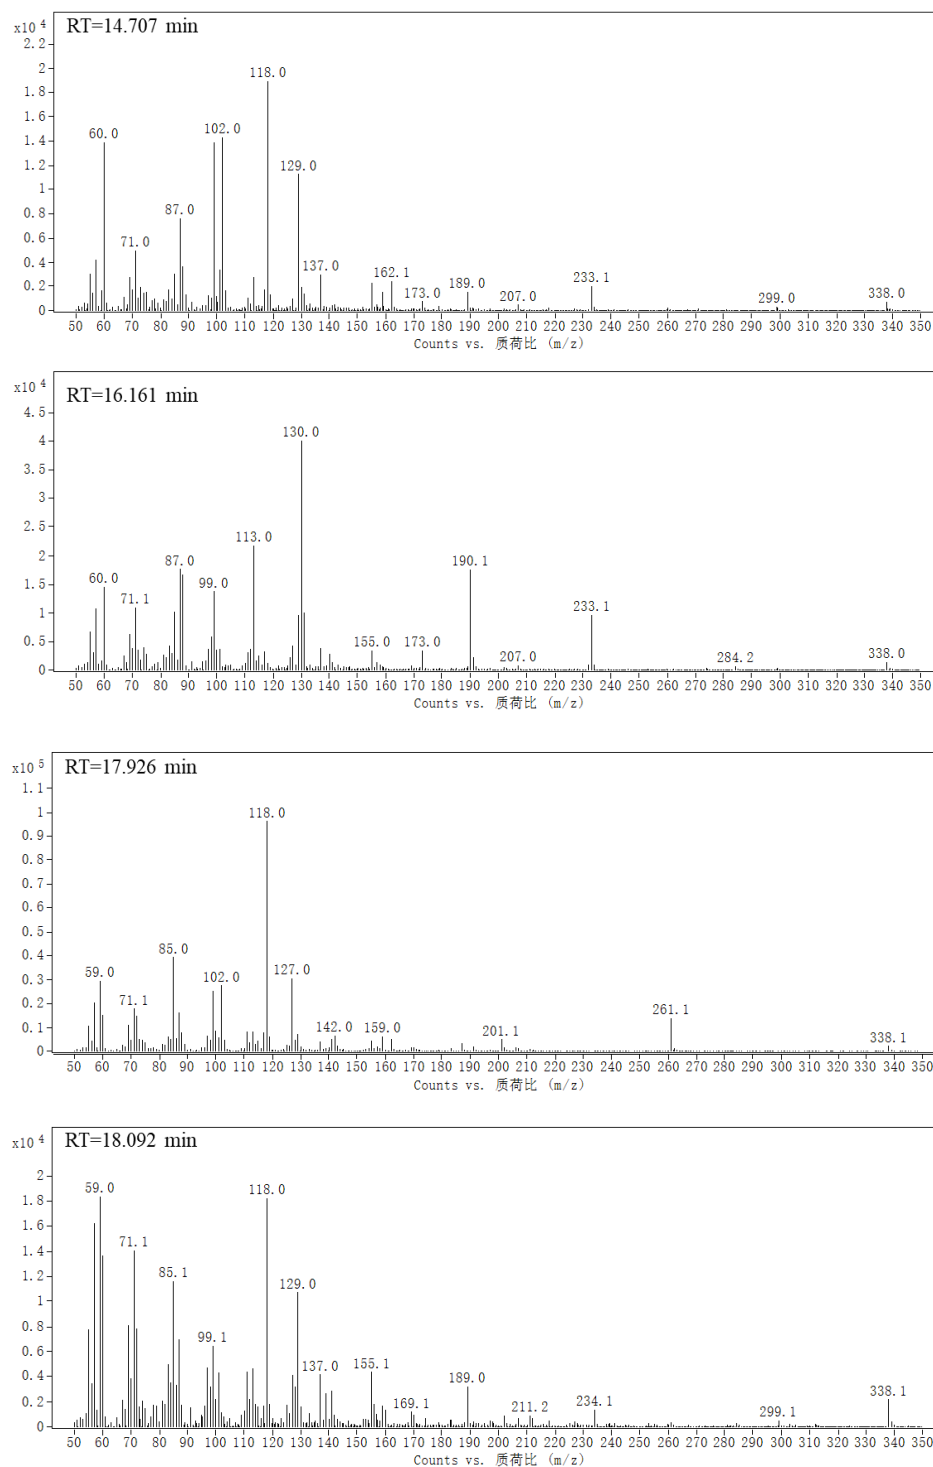

**Figure S2. Tandem mass spectra of the characteristic peaks.**

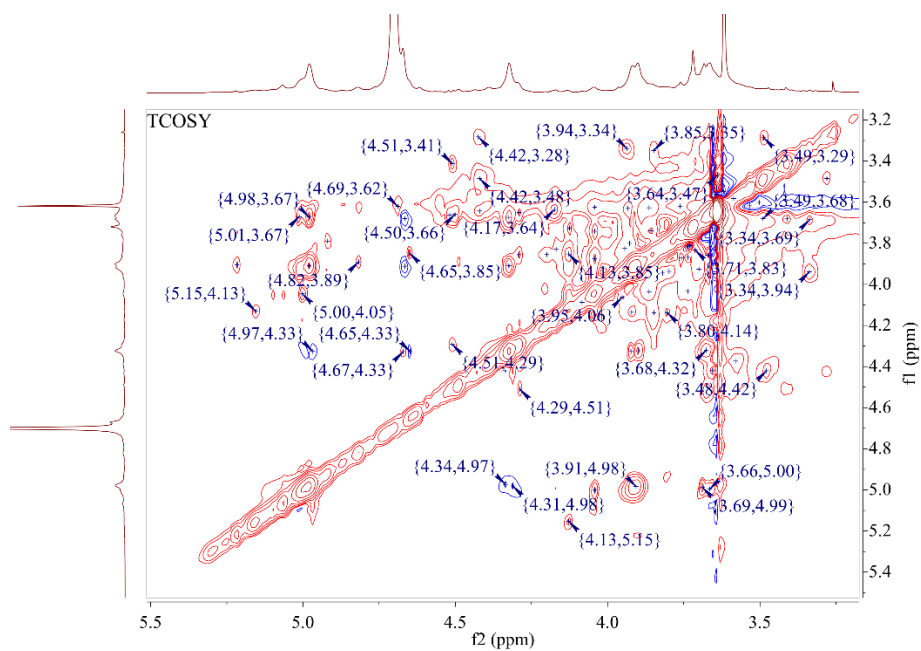

**Figure S3. TOCSY spectra of RLPa-2 glycosyl residues.**

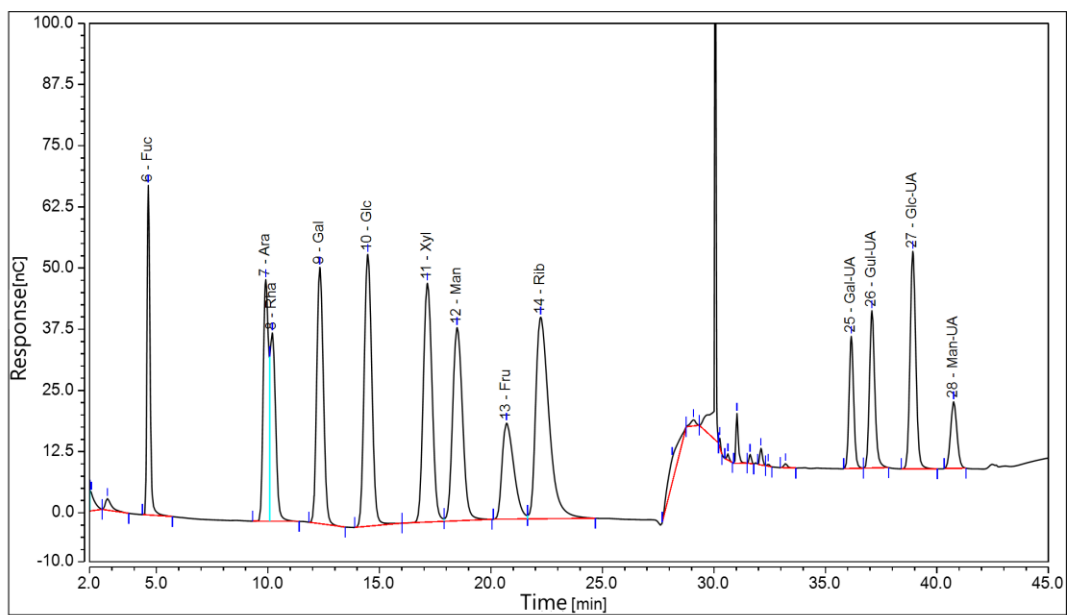

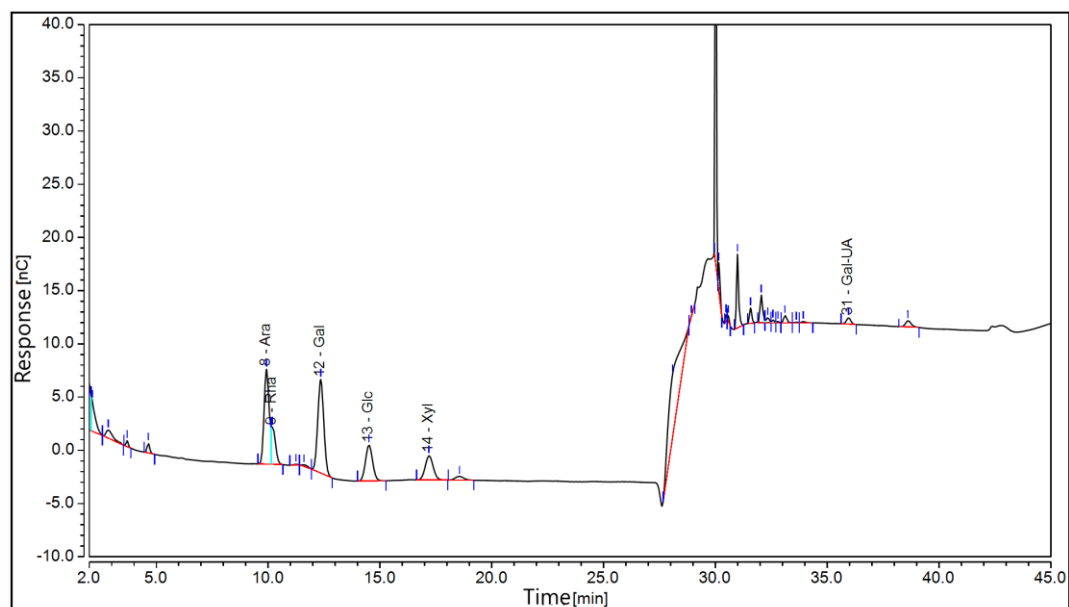

**Figure S4. Chromatogram of monosaccharide standards and monosaccharide components in RLPa-2.**

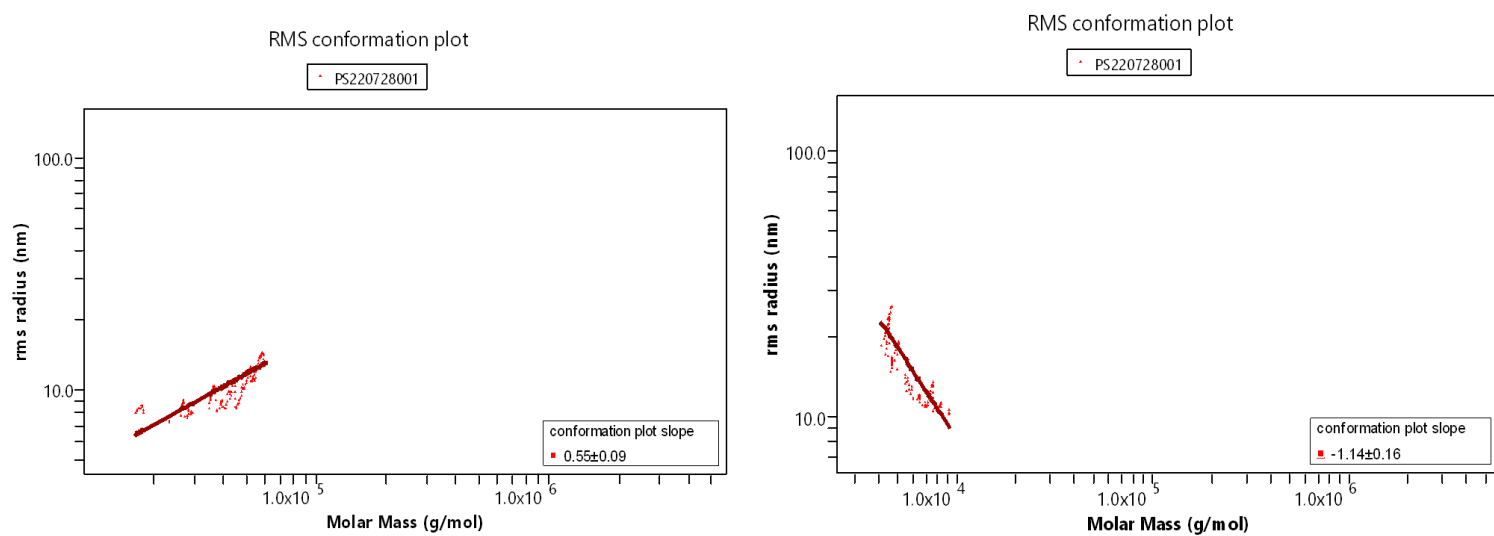

**Figure S5. Molecular conformation diagram with different molar masses.**

**Table S1. The molecular parameters of RLPa-2 determined by SEC-MALLS-RI.**

| <b>Molecular Characteristics</b> | <b>Parameter</b>             | <b>Detection Results</b> | <b>Uncertainty</b> |
|----------------------------------|------------------------------|--------------------------|--------------------|
| Molar mass moments               | $M_n$                        | 8.9 kDa                  | 0.02709            |
|                                  | $M_p$                        | 9.0 kDa                  | 0.01535            |
|                                  | $M_w$                        | 15.6 kDa                 | 0.01387            |
|                                  | $M_z$                        | 29.6 kDa                 | 0.02933            |
|                                  | Polydispersity ( $M_w/M_n$ ) | 1.7                      | 0.03043            |
| Rms radius moments               | $R_n$                        | 12.3 nm                  | 0.593              |
|                                  | $R_w$                        | 10.6 nm                  | 0.572              |
|                                  | $R_z$                        | 10.3 nm                  | 0.425              |
